# Supplementary material for: Pretreatment with VEGF(R)-inhibitors reduces interstitial fluid pressure, increases intraperitoneal chemotherapy drug penetration, and impedes tumor growth in a mouse colorectal carcinomatosis model
Source: PubMed Central journal article supplement (PMC4745770; doi:10.18632/oncotarget.5092), 2015-09-07
Supplement: oncotarget-06-29889-s001.pdf [file oncotarget-06-29889-s001.pdf]

## SUPPLEMENTARY TABLE AND FIGURE

Supplementary Table S1: Instrument settings and data acquisition parameters for LA-ICP-MS

| Laser ablation                             | New Wave Research                   |
|--------------------------------------------|-------------------------------------|
| Type                                       | UP193HE<br>ArF* excimer based laser |
| Measurements                               | Mapping                             |
| Wavelength, nm                             | 193                                 |
| Lateral scanning speed, $\mu\text{m/s}$    | 80                                  |
| Repetition frequency, Hz                   | 10                                  |
| Laser energy, $\text{J/cm}^2$              | 0.7–0.8                             |
| Diameter of laser beam, $\mu\text{m}$      | 80                                  |
| Ablation chamber                           | Standard cell                       |
| ICP-SFMS                                   | Element XR                          |
| Mass resolution, $\text{m}/\Delta\text{m}$ | 300                                 |
| RF power, W                                | 850                                 |
| Carrier gas flow rate, L/min               | He, 0.5                             |
| Make up gas flow rate, (L/min)             | Ar, 0.7                             |
| Number of runs                             | 200–300                             |
| Number of passes                           | 1                                   |
| Time per pass, s                           | 1                                   |

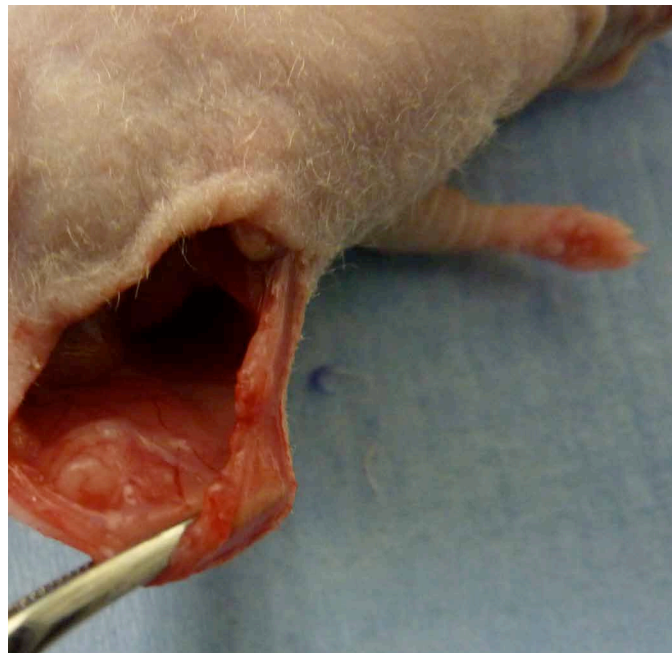

Supplementary Figure S1: Picture of a peritoneal tumor nodule.
